# Supplementary material for: Genetic Variation of the IL-28B Promoter Affecting Gene Expression
Source: PubMed Central journal article supplement (PMC3201970; doi:10.1371/journal.pone.0026620), 2011-10-25
Supplement: pone.0026620.s001.pdf [file pone.0026620.s001.pdf]

|             |                                                               |     |
|-------------|---------------------------------------------------------------|-----|
| IL28A_S.seq | ATGAAACTAGACATGACTGGGGACTGCACGCCAGTGCTGGTGCTGATGGCCGCAGTGCTG  | 60  |
| IL28A_K.seq | -----ATGACTGGGGACTGCACGCCAGTGCTGGTGCTGATGGCCGCAGTGCTG         | 48  |
| IL28B_S.seq | ATGAAACTAGACATGACCGGGGACTGCATGCCAGTGCTGGTGCTGATGGCCGCAGTGCTG  | 60  |
| IL28B_K.seq | -----ATGACCGGGGACTGCATGCCAGTGCTGGTGCTGATGGCCGCAGTGCTG         | 48  |
| IL28A_S.seq | ACCGTGA CTGGAGCAGTTCCTGTCGCCAGGCTCCACGGGGCTCTCCCGGATGCAAGGGGC | 120 |
| IL28A_K.seq | ACCGTGA CTGGAGCAGTTCCTGTCGCCAGGCTCCACGGGGCTCTCCCGGATGCAAGGGGC | 108 |
| IL28B_S.seq | ACCGTGA CTGGAGCAGTTCCTGTCGCCAGGCTCCCGGGGCTCTCCCGGATGCAAGGGGC  | 120 |
| IL28B_K.seq | ACCGTGA CTGGAGCAGTTCCTGTCGCCAGGCTCCCGGGGCTCTCCCGGATGCAAGGGGC  | 108 |
| IL28A_S.seq | TGCCACATAGCCCAGTTC AAGTCCCTGTCTCCACAGGAGCTGCAGGCCTTTAAGAGGGCC | 180 |
| IL28A_K.seq | TGCCACATAGCCCAGTTC AAGTCCCTGTCTCCACAGGAGCTGCAGGCCTTTAAGAGGGCC | 168 |
| IL28B_S.seq | TGCCACATAGCCCAGTTC AAGTCCCTGTCTCCACAGGAGCTGCAGGCCTTTAAGAGGGCC | 180 |
| IL28B_K.seq | TGCCACATAGCCCAGTTC AAGTCCCTGTCTCCACAGGAGCTGCAGGCCTTTAAGAGGGCC | 168 |
| IL28A_S.seq | AAAGATGCCTTAGAAGAGTCGCTTCTGCTGAAGGACTGCAGGTGCCACTCCCGCCTCTTC  | 240 |
| IL28A_K.seq | AAAGATGCCTTAGAAGAGTCGCTTCTGCTGAAGGACTGCAGGTGCCACTCCCGCCTCTTC  | 228 |
| IL28B_S.seq | AAAGATGCCTTAGAAGAGTCGCTTCTGCTGAAGGACTGCAAGTGCCGCTCCCGCCTCTTC  | 240 |
| IL28B_K.seq | AAAGATGCCTTAGAAGAGTCGCTTCTGCTGAAGGACTGCAAGTGCCGCTCCCGCCTCTTC  | 228 |
| IL28A_S.seq | CCCAGGACCTGGGACCTGAGGCAGCTGCAGGTGAGGGAGCGCCCCATGGCTTTGGAGGCT  | 300 |
| IL28A_K.seq | CCCAGGACCTGGGACCTGAGGCAGCTGCAGGTGAGGGAGCGCCCCATGGCTTTGGAGGCT  | 288 |
| IL28B_S.seq | CCCAGGACCTGGGACCTGAGGCAGCTGCAGGTGAGGGAGCGCCCCGTGGCTTTGGAGGCT  | 300 |
| IL28B_K.seq | CCCAGGACCTGGGACCTGAGGCAGCTGCAGGTGAGGGAGCGCCCCGTGGCTTTGGAGGCT  | 288 |
| IL28A_S.seq | GAGCTGGCCCTGACGCTGAAGGTTCTGGAGGCCACCGCTGACACTGACCCAGCCCTGGTG  | 360 |
| IL28A_K.seq | GAGCTGGCCCTGACGCTGAAGGTTCTGGAGGCCACCGCTGACACTGACCCAGCCCTGGTG  | 348 |
| IL28B_S.seq | GAGCTGGCCCTGACGCTGAAGGTTCTGGAGGCCACCGCTGACACTGACCCAGCCCTGGGG  | 360 |
| IL28B_K.seq | GAGCTGGCCCTGACGCTGAAGGTTCTGGAGGCCCTCCGCTGACACTGACCCAGCCCTGGGG | 348 |
| IL28A_S.seq | GACGTCTTGGACCAGCCCCTTCACACCCTGCACCATATCCTCTCCCAGTTCGGGGCTGT   | 420 |
| IL28A_K.seq | GACGTCTTGGACCAGCCCCTTCACACCCTGCACCATATCCTCTCCCAGTTCGGGGCTGT   | 408 |
| IL28B_S.seq | GATGTCTTGGACCAGCCCCTTCACACCCTGCACCATATCCTCTCCCAGTTCGGGGCTGT   | 420 |
| IL28B_K.seq | GATGTCTTGGACCAGCCCCTTCACACCCTGCACCATATCCTCTCCCAGTTCGGGGCTGT   | 408 |
| IL28A_S.seq | ATCCAGCCTCAGCCCACGGCAGGGCCCAGGACCCGGGGCCGCCTCCACCATTTGGCTGTAC | 480 |
| IL28A_K.seq | ATCCAGCCTCAGCCCACGGCTGGGCCAGGGCCCAGGGCCGCCTCCACCATTTGGCTGTAC  | 468 |
| IL28B_S.seq | ATCCAGCCTCAGCCCACGGCAGGGCCCAGGACCCGGGGCCGCCTCCACCATTTGGCTGCAC | 480 |
| IL28B_K.seq | ATCCAGCCTCAGCCCACGGCAGGGCCCAGGACCCGGGGCCGCCTCCACCATTTGGCTGTAC | 468 |
| IL28A_S.seq | CGGCTCCAGGAGGCCCCAAAAAAGGAGTCCCCTGGCTGCCTCGAGGCCTCTGTCACCTTC  | 540 |
| IL28A_K.seq | CGGCTCCAGGAGGCCCCAAAAAAGGAGTCCCCTGGCTGCCTCGAGGCCTCTGTCACCTTC  | 528 |
| IL28B_S.seq | CGGCTCCAGGAGGCCCCAAAAAAGGAGTCCCCTGGCTGCCTCGAGGCCTCTGTCACCTTC  | 540 |
| IL28B_K.seq | CGGCTCCAGGAGGCCCCAAAAAAGGAGTCCCCTGGCTGCCTCGAGGCCTCTGTCACCTTC  | 528 |
| IL28A_S.seq | AACCTCTTCCGCCTCCTCACGCGAGACCTGAATTGTGTTGCCAGTGGGGACCTGTGTGTC  | 600 |
| IL28A_K.seq | AACCTCTTCCGCCTCCTCACGCGAGACCTGAATTGTGTTGCCAGTGGGGACCTGTGTGTC  | 588 |
| IL28B_S.seq | AACCTCTTCCGCCTCCTCACGCGAGACCTGAATTGTGTTGCCAGCGGGGACCTGTGTGTC  | 600 |
| IL28B_K.seq | AACCTCTTCCGCCTCCTCACGCGAGACCTGAATTGTGTTGCCAGCGGGGACCTGTGTGTC  | 588 |
| IL28A_S.seq | TGA                                                           | 603 |
| IL28A_K.seq | TGA                                                           | 591 |
| IL28B_S.seq | TGA                                                           | 603 |
| IL28B_K.seq | TGA                                                           | 591 |

Figure S1
