# Supplementary material for: Genetic Variation of the IL-28B Promoter Affecting Gene Expression
Source: PubMed Central journal article supplement (PMC3201970; doi:10.1371/journal.pone.0026620), 2011-10-25
Supplement: pone.0026620.s003.pdf [file pone.0026620.s003.pdf]

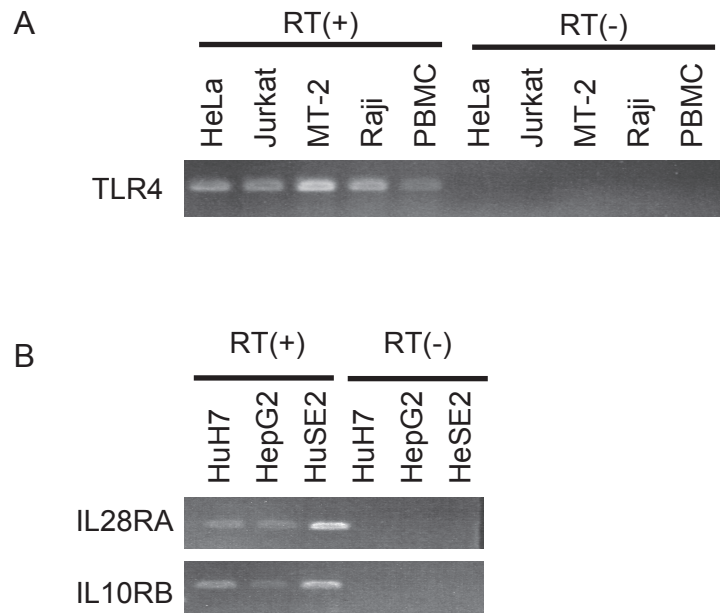

Figure S3
